# Supplementary material for: Evolution of a Signaling Nexus Constrained by Protein Interfaces and Conformational States
Source: PubMed Central journal article supplement (PMC2954821; doi:10.1371/journal.pcbi.1000962), 2010-10-14
Supplement: pcbi.1000962.s002.pdf [file pcbi.1000962.s002.pdf]

Table S1: Human  $G\alpha$  Classes, Subclasses, and Isoforms

| Class          | Subclass        | Isoform        | Gene   | UniProt Accession | Included in Analysis |
|----------------|-----------------|----------------|--------|-------------------|----------------------|
| G(io)          | G(i)            | $G\alpha_{i1}$ | GNAI1  | P63096            | Yes                  |
|                |                 | $G\alpha_{i2}$ | GNAI2  | P04899            | Yes                  |
|                |                 | $G\alpha_{i3}$ | GNAI3  | P08754            | Yes                  |
|                | G(o)            | $G\alpha_{o1}$ | GNAO1  | P09471            | Yes                  |
|                |                 | $G\alpha_{o2}$ | GNAO1  | P09471-2          | Yes                  |
|                | G(t)            | $G\alpha_{t1}$ | GNAT1  | P11488            | Yes                  |
|                |                 | $G\alpha_{t2}$ | GNAT2  | P19087            | Yes                  |
|                |                 | $G\alpha_{t3}$ | GNAT3  | A8MTJ3            | No                   |
|                | G(z)            | $G\alpha_z$    | GNAZ   | P19086            | No                   |
|                | G(q)            | $G\alpha_q$    | GNAQ   | P50148            | Yes                  |
| $G\alpha_{11}$ |                 | GNA11          | P29992 | Yes               |                      |
| $G\alpha_{14}$ |                 | GNA14          | O95837 | Yes               |                      |
| $G\alpha_{15}$ |                 | GNA15          | P30679 | No                |                      |
| G(s)           | $G\alpha_s$     | GNAS           | P63092 | Yes               |                      |
|                | $G\alpha_{olf}$ | GNAL           | P38405 | Yes               |                      |
| G(12)          | $G\alpha_{12}$  | GNA12          | Q03113 | Yes               |                      |
|                | $G\alpha_{13}$  | GNA13          | Q14344 | Yes               |                      |
