# Supplementary material for: Evolution of a Signaling Nexus Constrained by Protein Interfaces and Conformational States
Source: PubMed Central journal article supplement (PMC2954821; doi:10.1371/journal.pcbi.1000962), 2010-10-14
Supplement: pcbi.1000962.s003.pdf [file pcbi.1000962.s003.pdf]

TABLE S2: Class-Distinctive Sites Summary

| Site <sup>1</sup> | $\eta$ amino acid | $\delta$ amino acid (subclass)                                                                     | Distinctive Class <sup>2</sup> | Position within Class <sup>3</sup> | Comments                                               |
|-------------------|-------------------|----------------------------------------------------------------------------------------------------|--------------------------------|------------------------------------|--------------------------------------------------------|
| 1                 | D/E               | A ( $G\alpha_{12}$ )<br>G ( $G\alpha_{13}$ ) <sup>7</sup>                                          | G(12)                          | #1                                 |                                                        |
| 2                 | D/E               | A ( $G\alpha_q$ )<br>V ( $G\alpha_{11}$ ) <sup>7,8</sup>                                           | G(q)                           | #1                                 |                                                        |
| 3                 | K/R               | A ( $G\alpha_{13}$ ) <sup>5,8</sup>                                                                | G(12)                          | #2                                 |                                                        |
| 4                 | K/R               | D ( $G\alpha_q$ )<br>A ( $G\alpha_{11}, G\alpha_{14}$ ) <sup>7</sup>                               | G(q)                           | #2                                 | Less aqueous environment during GPCR-driven activation |
| 5                 | K/R               | A ( $G\alpha_{12}$ ) <sup>5,8</sup>                                                                | G(12)                          | #3                                 | Less aqueous environment during GPCR-driven activation |
| 6                 | L                 | V (mouse $G\alpha_q, G\alpha_{14}$ ) <sup>6,8</sup>                                                | G(q)                           | #3                                 |                                                        |
| 7                 | K/R               | E ( $G\alpha_i, G\alpha_o, G\alpha_i$ ) <sup>4</sup>                                               | G(io)                          | #1                                 | Potential contact to GPCR                              |
| 8                 | K/R               | G ( $G\alpha_i, G\alpha_o$ )<br>A ( $G\alpha_i$ ) <sup>7</sup>                                     | G(io)                          | #2                                 | Potential contact to GPCR                              |
| 9                 | K/R               | A ( $G\alpha_i, G\alpha_o, G\alpha_i$ ) <sup>4</sup>                                               | G(io)                          | #3                                 | Potential contact to GPCR                              |
| 10                | K/R               | A ( $G\alpha_s, G\alpha_{olf}$ ) <sup>4</sup>                                                      | G(s)                           | #1                                 | Key for GPCR selectivity in G(q) subunits              |
| 11                | A                 | T ( $G\alpha_q, G\alpha_{11}, G\alpha_{14}$ ) <sup>4</sup>                                         | G(q)                           | #4                                 |                                                        |
| 12                | G                 | D/E ( $G\alpha_{12}, G\alpha_{13}$ ) <sup>4</sup>                                                  | G(12)                          | #4                                 |                                                        |
| 13                | F/Y               | S (rat $G\alpha_{olf}$ ) <sup>6,8</sup>                                                            | G(s)                           | #2                                 |                                                        |
| 14                | D/E               | A ( $G\alpha_{12}, G\alpha_{13}$ ) <sup>4</sup>                                                    | G(12)                          | #5                                 |                                                        |
| 15                | F/Y               | K ( $G\alpha_s, G\alpha_{olf}$ ) <sup>4</sup>                                                      | G(s)                           | #3                                 |                                                        |
| 16                | F/Y               | K/R ( $G\alpha_s, G\alpha_{olf}$ ) <sup>4</sup>                                                    | G(s)                           | #4                                 |                                                        |
| 17                | I/L               | M ( $G\alpha_q, G\alpha_{11}, G\alpha_{14}$ ) <sup>4</sup><br>V (rat $G\alpha_{11}$ ) <sup>6</sup> | G(q)                           | #5                                 |                                                        |
| 18                | M                 | R ( $G\alpha_{12}, G\alpha_{13}$ ) <sup>4</sup>                                                    | G(12)                          | #6                                 |                                                        |
| 19                | N                 | R ( $G\alpha_i, G\alpha_o, G\alpha_{11}$ )<br>C ( $G\alpha_{12}$ ) <sup>7</sup>                    | G(io)                          | #4                                 |                                                        |
| 20                | C                 | A ( $G\alpha_{12}, G\alpha_{13}$ ) <sup>4</sup>                                                    | G(12)                          | #7                                 |                                                        |
| 21                | S                 | C ( $G\alpha_s, G\alpha_{olf}$ ) <sup>4</sup>                                                      | G(s)                           | #5                                 |                                                        |
| 22                | I/L               | V ( $G\alpha_{11}$ ) <sup>5,8</sup>                                                                | G(q)                           | #6                                 |                                                        |
| 23                | K/R               | V ( $G\alpha_s$ )<br>S ( $G\alpha_{olf}$ ) <sup>7</sup>                                            | G(s)                           | #6                                 |                                                        |
| 24                | S/T               | N (mouse, bovine $G\alpha_{12}$ ) <sup>6,8</sup>                                                   | G(io)                          | #5                                 |                                                        |
| 25                | R                 | L ( $G\alpha_{12}, G\alpha_{13}$ ) <sup>4</sup>                                                    | G(12)                          | #8                                 |                                                        |
| 26                | V                 | K/R ( $G\alpha_{12}, G\alpha_{13}$ ) <sup>4</sup>                                                  | G(12)                          | #9                                 | Tethers Switch I to insert in $\alpha$ -helical domain |
| 27                | S/T               | K ( $G\alpha_{12}, G\alpha_{13}$ ) <sup>4</sup>                                                    | G(12)                          | #10                                | Mutation diminishes P115RhoGEF binding                 |
| 28                | K/R               | H ( $G\alpha_s, G\alpha_{olf}$ ) <sup>4</sup>                                                      | G(s)                           | #7                                 |                                                        |
| 29                | M                 | L ( $G\alpha_o$ ) <sup>5,8</sup>                                                                   | G(io)                          | #6                                 |                                                        |
| 30                | S                 | D ( $G\alpha_s, G\alpha_{olf}$ ) <sup>4</sup>                                                      | G(s)                           | #8                                 |                                                        |
| 31                | E                 | Q ( $G\alpha_{12}$ ) <sup>5,8</sup>                                                                | G(12)                          | #11                                |                                                        |
| 32                | K/R               | Q ( $G\alpha_{12}$ ) <sup>5,8</sup>                                                                | G(12)                          | #12                                | Contact to p115RhoGEF                                  |
| 33                | I                 | F ( $G\alpha_{12}, G\alpha_{13}$ ) <sup>4</sup>                                                    | G(12)                          | #13                                | Contact to p115RhoGEF                                  |
| 34                | D/E               | N ( $G\alpha_s, G\alpha_{olf}$ ) <sup>4</sup>                                                      | G(s)                           | #9                                 | Mutant slightly reduces adenylyl cyclase binding       |
| 35                | V                 | I ( $G\alpha_{12}$ ) <sup>5,8</sup>                                                                | G(12)                          | #14                                |                                                        |
| 36                | I/L               | M ( $G\alpha_q, G\alpha_{11}$ ) <sup>5,8</sup>                                                     | G(q)                           | #7                                 |                                                        |

|    |     |                                                                                     |       |     |                                                                                               |
|----|-----|-------------------------------------------------------------------------------------|-------|-----|-----------------------------------------------------------------------------------------------|
| 37 | A   | S ( $G\alpha_{12}, G\alpha_{13}$ ) <sup>4</sup>                                     | G(12) | #15 |                                                                                               |
| 38 | D   | N ( $G\alpha_s, G\alpha_{olf}$ ) <sup>4</sup>                                       | G(s)  | #10 |                                                                                               |
| 39 | D   | S ( $G\alpha_q, G\alpha_{11}$ )<br>C ( $G\alpha_{14}$ ) <sup>7</sup>                | G(q)  | #8  |                                                                                               |
| 40 | I   | T (orangutan $G\alpha_{11}$ ) <sup>6,8</sup>                                        | G(io) | #7  |                                                                                               |
| 41 | N   | T ( $G\alpha_q, G\alpha_{11}, G\alpha_{14}$ ) <sup>4</sup>                          | G(q)  | #9  | Contact to GRK2                                                                               |
| 42 | K/R | P ( $G\alpha_q, G\alpha_{11}, G\alpha_{14}$ ) <sup>4</sup>                          | G(q)  | #10 | P→K mutation eliminates GRK2 binding                                                          |
| 43 | F   | L ( $G\alpha_s, G\alpha_{olf}$ ) <sup>4</sup>                                       | G(s)  | #11 | Important for adenylyl cyclase binding                                                        |
| 44 | I   | V ( $G\alpha_t$ ) <sup>5,8</sup>                                                    | G(io) | #8  |                                                                                               |
| 45 | L   | F ( $G\alpha_i, G\alpha_o, G\alpha_t$ ) <sup>4</sup>                                | G(io) | #9  |                                                                                               |
| 46 | P   | L ( $G\alpha_{13}$ ) <sup>5,8</sup>                                                 | G(12) | #16 |                                                                                               |
| 47 | G   | R ( $G\alpha_s$ )<br>N ( $G\alpha_{olf}$ ) <sup>7</sup>                             | G(s)  | #12 |                                                                                               |
| 48 | A   | V ( $G\alpha_{12}, G\alpha_{13}$ ) <sup>4</sup>                                     | G(12) | #17 |                                                                                               |
| 49 | F/Y | H (rodent $G\alpha_{o2}$ ) <sup>6,8</sup>                                           | G(io) | #10 |                                                                                               |
| 50 | K/R | H ( $G\alpha_s, G\alpha_{olf}$ ) <sup>4</sup>                                       | G(s)  | #13 | Important for adenylyl cyclase binding                                                        |
| 51 | F   | V ( $G\alpha_{o2}$ ) <sup>6</sup><br>M ( $G\alpha_{o1}, G\alpha_t$ ) <sup>7,8</sup> | G(io) | #11 |                                                                                               |
| 52 | C   | T ( $G\alpha_{12}, G\alpha_{13}$ ) <sup>4</sup>                                     | G(12) | #18 |                                                                                               |
| 53 | D   | N ( $G\alpha_{13}$ ) <sup>5,8</sup>                                                 | G(12) | #19 |                                                                                               |
| 54 | D/E | K ( $G\alpha_i$ )<br>N ( $G\alpha_o$ )<br>Q ( $G\alpha_i$ ) <sup>7</sup>            | G(io) | #12 | Mobility changes during GPCR-driven activation, decreased rate of receptor-catalyzed exchange |
| 55 | K/R | Q ( $G\alpha_i, G\alpha_o$ ) <sup>5,8</sup>                                         | G(io) | #13 | Mutation increased basal rate of exchange, decreased rate of receptor-catalyzed exchange      |
| 56 | V   | C ( $G\alpha_s, G\alpha_{olf}$ ) <sup>4</sup>                                       | G(s)  | #14 |                                                                                               |
| 57 | K/R | T ( $G\alpha_i, G\alpha_o, G\alpha_t$ ) <sup>4</sup>                                | G(io) | #14 | Mutation decreased rate of receptor-catalyzed exchange                                        |
| 58 | I/L | Q ( $G\alpha_s, G\alpha_{olf}$ ) <sup>4</sup>                                       | G(s)  | #15 |                                                                                               |
| 59 | N   | H ( $G\alpha_s, G\alpha_{olf}$ ) <sup>4</sup>                                       | G(s)  | #16 |                                                                                               |

<sup>1</sup> Corresponds to the order of sites in Figure 2.

<sup>2</sup> G(io), G(q), G(s), and G(12) sites denoted by 'I', 'Q', 'S', and '2', respectively, in Figure 2.

<sup>3</sup> Corresponds to the site number given in Figures 3-6 and the order of sites in Figure 7.

<sup>4</sup> Single  $\partial$  amino acid in all subclasses within distinctive class

<sup>5</sup> Single  $\partial$  amino acid in some but not all subclasses within distinctive class

<sup>6</sup> Single  $\partial$  amino acid in just a few sequences (but not an entire subclass) within distinctive class

<sup>7</sup>  $\partial$  amino acid varies with subclass within distinctive class

<sup>8</sup>  $\eta$  amino acids found in distinctive class
