# Supplementary material for: Evolution of a Signaling Nexus Constrained by Protein Interfaces and Conformational States
Source: PubMed Central journal article supplement (PMC2954821; doi:10.1371/journal.pcbi.1000962), 2010-10-14
Supplement: pcbi.1000962.s004.pdf [file pcbi.1000962.s004.pdf]

TABLE S3: d Sites Summary

| d Site <sup>1</sup> | $\eta$ amino acid | $\partial$ amino acid (subclass)                                                | Distinctive Class | $\partial$ amino acid (subclass)                        | Distinctive Class | Class-Distinctive Site(s) Within 5 Å                 |
|---------------------|-------------------|---------------------------------------------------------------------------------|-------------------|---------------------------------------------------------|-------------------|------------------------------------------------------|
| 1                   | S                 | N ( $G\alpha_s, G\alpha_{olf}$ )                                                | G(s)              | N ( $G\alpha_q, G\alpha_{11}$ )                         | G(q)              | G(q)-D#2                                             |
| 2                   | D/E               | G ( $G\alpha_s$ )                                                               | G(s)              | K/R ( $G\alpha_{12}, G\alpha_{13}$ )                    | G(12)             | G(12)-D #5                                           |
| 3                   | K/R               | C ( $G\alpha_i, G\alpha_t$ )<br>V ( $G\alpha_o$ )                               | G(i)              | L ( $G\alpha_{12}$ )                                    | G(12)             | G(12)-D #5                                           |
| 4                   | Q                 | K/R ( $G\alpha_s, G\alpha_{olf}$ )                                              | G(s)              | R ( $G\alpha_{12}$ )                                    | G(12)             | G(12)-D#7                                            |
| 5                   | D/E               | N ( $G\alpha_o, G\alpha_{i1}$ )<br>S ( $G\alpha_{i3}$ )<br>G ( $G\alpha_{i2}$ ) | G(io)             | S ( $G\alpha_{12}$ )                                    | G(12)             | G(12)-D#7                                            |
| 6                   | K                 | A,S ( $G\alpha_i$ )<br>S,G ( $G\alpha_t$ )                                      | G(io)             | Q ( $G\alpha_s, G\alpha_{olf}$ )                        | G(s)              | G(s)-D#5                                             |
| 7                   | D/E               | N ( $G\alpha_i, G\alpha_{12}$ )<br>S ( $G\alpha_{i1}$ )                         | G(io)             | N ( $G\alpha_q$ )<br>T ( $G\alpha_{11}, G\alpha_{14}$ ) | G(q)              | G(q)-D#6                                             |
| 8                   | Q                 | L ( $G\alpha_i$ )<br>M ( $G\alpha_t$ )                                          | G(io)             | M ( $G\alpha_s, G\alpha_{olf}$ )                        | G(s)              | G(s)-D#10                                            |
| 9                   | T                 | M ( $G\alpha_i$ )<br>V ( $G\alpha_t$ )                                          | G(io)             | E ( $G\alpha_q, G\alpha_{11}, G\alpha_{14}$ )           | G(q)              | G(q)-D#8                                             |
| 10                  | N                 | H ( $G\alpha_t$ )                                                               | G(io)             | Y ( $G\alpha_q, G\alpha_{11}, G\alpha_{14}$ )           | G(q)              | G(q)-D#9<br>G(q)-D#10<br>G(io)-D#7                   |
| 11                  | W                 | F/Y ( $G\alpha_{o1}, G\alpha_i$ )                                               | G(io)             | L ( $G\alpha_{12}$ )<br>V ( $G\alpha_{13}$ )            | G(12)             | G(12)-D#13                                           |
| 12                  | I/L               | M ( $G\alpha_{olf}$ )                                                           | G(s)              | V ( $G\alpha_{t1}$ )                                    | G(io)             | G(io)-D#9                                            |
| 13                  | Y                 | C ( $G\alpha_i, G\alpha_o, G\alpha_t$ )                                         | G(io)             | H ( $G\alpha_{12}$ )                                    | G(12)             | G(12)-D#16                                           |
| 14                  | I/L               | V (rodent $G\alpha_{o2}$ )                                                      | G(io)             | C ( $G\alpha_s, G\alpha_{olf}$ )                        | G(s)              | G(s)-D#13                                            |
| 15                  | I                 | V (human $G\alpha_{12}$ )                                                       | G(12)             | V ( $G\alpha_i, G\alpha_t$ )                            | G(io)             | G(io)-D#12<br>G(io)-D#13<br>G(12)-D#18<br>G(12)-D#19 |
| 16                  | A                 | D ( $G\alpha_{13}$ )                                                            | G(12)             | D ( $G\alpha_s$ )                                       | G(s)              | G(s)-D#14                                            |

<sup>1</sup> Corresponds to the order of sites in Figure 2.
