# Supplementary material for: Evolution of a Signaling Nexus Constrained by Protein Interfaces and Conformational States
Source: PLoS Comput Biol. 2010 Oct 14;6(10):e1000962. doi: 10.1371/journal.pcbi.1000962 (PMC2954821; doi:10.1371/journal.pcbi.1000962)
Supplement: Table S4 — Mutual information calculations. (0.02 MB PDF) [file pcbi.1000962.s005.pdf]

Table S4: Class-Distinctive Sites Defined by Series of Mutual Information Calculations

|                              |                        | Classes Included in MI Calculation at a Given Site <sup>1</sup> |                 |                  |                |                 |                 |
|------------------------------|------------------------|-----------------------------------------------------------------|-----------------|------------------|----------------|-----------------|-----------------|
| Class<br>Distinctive<br>Site |                        | G(io) &<br>G(q)                                                 | G(io) &<br>G(s) | G(io) &<br>G(12) | G(q) &<br>G(s) | G(q) &<br>G(12) | G(s) &<br>G(12) |
|                              | Invariant <sup>2</sup> | 0.0                                                             | 0.0             | 0.0              | 0.0            | 0.0             | 0.0             |
|                              | G(io)-D <sup>3</sup>   | >0.0                                                            | >0.0            | >0.0             | 0.0            | 0.0             | 0.0             |
|                              | G(q)-D <sup>3</sup>    | >0.0                                                            | 0.0             | 0.0              | >0.0           | >0.0            | 0.0             |
|                              | G(s)-D <sup>3</sup>    | 0.0                                                             | >0.0            | 0.0              | >0.0           | 0.0             | >0.0            |
|                              | G(12)-D <sup>3</sup>   | 0.0                                                             | 0.0             | >0.0             | 0.0            | >0.0            | >0.0            |

<sup>1</sup>Six independent MI calculations were carried out, each MI calculation involving sequences from only 2 of the 4 G $\alpha$  classes.

<sup>2</sup>A site was defined as “Invariant” when the MI score was 0.0 for all 6 MI calculations at that site.

<sup>3</sup>A site was defined as “Distinctive” for a given G $\alpha$  class when the six MI scores at that site fit the criteria established for that class.
